# Supplementary material for: Fine tuning laser focus for improved reproducibility of U–Pb isotope analysis by LA-ICP-MS
Source: Royal Society of Chemistry journal article supplement (doi:10.1039/d1ja00044f), 2021-01-01
Supplement: d1ja00044f1.xlsx [file d1ja00044f1.xlsx]

## Sheet: PlotDat2
Source sheet	190410focus_All_Integrations	0.3	1055.92	1	1060.2	17
Plot name	Average1	10.7	1055.92	2	1051.9	17
Plot Type	15			3	1068.4	17
1st free col	8			4	1055.1	17
Sigma Level	2			5	1053.2	17
Absolute Errs	TRUE			6	1047.9	17
Symbol Type	1			7	1061.7	17
Inverse Plot	FALSE			8	1061.6	17
Color Plot	TRUE			9	1048.1	17
3D plot	FALSE			10	1051.1	17
Linear	FALSE			IsoLine	IsoLine	IsoLine	IsoLine
Data Range	AG2:AG11,AI2:AI11
Filled Symbols	FALSE
ConcAge	FALSE
ConcSwap	FALSE
1st Symbol-row	1

## Sheet: PlotDat3
Source sheet	190410focus_All_Integrations	0.3	1049.91	1	1054.7	17
Plot name	Average2	10.7	1049.91	2	1047.4	17
Plot Type	15			3	1050.7	16
1st free col	8			4	1062.9	17
Sigma Level	2			5	1055.2	17
Absolute Errs	TRUE			6	1047.1	17
Symbol Type	1			7	1048.5	17
Inverse Plot	FALSE			8	1047.2	17
Color Plot	TRUE			9	1031.5	17
3D plot	FALSE			10	1053.8	17
Linear	FALSE			IsoLine	IsoLine	IsoLine	IsoLine
Data Range	AG12:AG21,AI12:AI21
Filled Symbols	FALSE
ConcAge	FALSE
ConcSwap	FALSE
1st Symbol-row	1

## Sheet: PlotDat4
Source sheet	190410focus_All_Integrations	0.3	1021.23	1	1039.3	17
Plot name	Average3	10.7	1021.23	2	1006	16
Plot Type	15			3	1022.8	16
1st free col	8			4	1018	16
Sigma Level	2			5	1016.6	16
Absolute Errs	TRUE			6	1035	17
Symbol Type	1			7	1011.5	17
Inverse Plot	FALSE			8	1023.3	17
Color Plot	TRUE			9	1023.7	17
3D plot	FALSE			10	1018.9	17
Linear	FALSE			IsoLine	IsoLine	IsoLine	IsoLine
Data Range	AG22:AG31,AI22:AI31
Filled Symbols	FALSE
ConcAge	FALSE
ConcSwap	FALSE
1st Symbol-row	1

## Sheet: PlotDat5
Source sheet	190410focus_All_Integrations	0.3	1005.7	1	1021.2	17
Plot name	Average4	10.7	1005.7	2	989.1	17
Plot Type	15			3	1021.8	17
1st free col	8			4	1007.9	16
Sigma Level	2			5	1009.1	16
Absolute Errs	TRUE			6	1010.6	17
Symbol Type	1			7	994	16
Inverse Plot	FALSE			8	998.7	16
Color Plot	TRUE			9	1003.4	17
3D plot	FALSE			10	1002.9	17
Linear	FALSE			IsoLine	IsoLine	IsoLine	IsoLine
Data Range	AG32:AG41,AI32:AI41
Filled Symbols	FALSE
ConcAge	FALSE
ConcSwap	FALSE
1st Symbol-row	1

## Sheet: PlotDat6
Source sheet	190410focus_All_Integrations	0.3	980.724	1	980.2	16
Plot name	Average5	10.7	980.724	2	973.8	17
Plot Type	15			3	987.1	17
1st free col	8			4	981.4	16
Sigma Level	2			5	977.7	16
Absolute Errs	TRUE			6	994.1	18
Symbol Type	1			7	986.3	17
Inverse Plot	FALSE			8	972.7	17
Color Plot	TRUE			9	982.4	17
3D plot	FALSE			10	974.2	16
Linear	FALSE			IsoLine	IsoLine	IsoLine	IsoLine
Data Range	AG42:AG51,AI42:AI51
Filled Symbols	FALSE
ConcAge	FALSE
ConcSwap	FALSE
1st Symbol-row	1

## Sheet: PlotDat7
Source sheet	190410focus_All_Integrations	0.3	1061.51	1	1060.7	17
Plot name	Average6	10.7	1061.51	2	1040.9	17
Plot Type	15			3	1055.5	17
1st free col	8			4	1047.3	17
Sigma Level	2			5	1071.8	17
Absolute Errs	TRUE			6	1072.9	17
Symbol Type	1			7	1069.1	17
Inverse Plot	FALSE			8	1057.7	17
Color Plot	TRUE			9	1073.4	17
3D plot	FALSE			10	1065.8	17
Linear	FALSE			IsoLine	IsoLine	IsoLine	IsoLine
Data Range	AG52:AG61,AI52:AI61
Filled Symbols	FALSE
ConcAge	FALSE
ConcSwap	FALSE
1st Symbol-row	1

## Sheet: PlotDat8
Source sheet	190410focus_All_Integrations	0.3	1048.01	1	1046.8	17
Plot name	Average7	10.7	1048.01	2	1051.7	17
Plot Type	15			3	1052.3	17
1st free col	8			4	1037.5	17
Sigma Level	2			5	1035.5	17
Absolute Errs	TRUE			6	1036	17
Symbol Type	1			7	1047	17
Inverse Plot	FALSE			8	1053.2	17
Color Plot	TRUE			9	1061.2	17
3D plot	FALSE			10	1058.9	17
Linear	FALSE			IsoLine	IsoLine	IsoLine	IsoLine
Data Range	AG62:AG71,AI62:AI71
Filled Symbols	FALSE
ConcAge	FALSE
ConcSwap	FALSE
1st Symbol-row	1

## Sheet: PlotDat9
Source sheet	190410focus_All_Integrations	0.3	1022.98	1	1026.2	17
Plot name	Average8	10.7	1022.98	2	1022.1	16
Plot Type	15			3	1025.5	16
1st free col	8			4	1013.6	16
Sigma Level	2			5	1028.4	17
Absolute Errs	TRUE			6	1019.1	16
Symbol Type	1			7	1032.5	17
Inverse Plot	FALSE			8	1012.7	16
Color Plot	TRUE			9	1027.1	16
3D plot	FALSE			10	1024.9	17
Linear	FALSE			IsoLine	IsoLine	IsoLine	IsoLine
Data Range	AG72:AG81,AI72:AI81
Filled Symbols	FALSE
ConcAge	FALSE
ConcSwap	FALSE
1st Symbol-row	1

## Sheet: PlotDat10
Source sheet	190410focus_All_Integrations	0.3	1003.63	1	998.5	16
Plot name	Average9	10.7	1003.63	2	1014.7	17
Plot Type	15			3	1004.1	16
1st free col	8			4	1006.7	16
Sigma Level	2			5	1010	16
Absolute Errs	TRUE			6	1001.3	16
Symbol Type	1			7	1006.5	17
Inverse Plot	FALSE			8	997.2	16
Color Plot	TRUE			9	1000.9	17
3D plot	FALSE			10	996.9	17
Linear	FALSE			IsoLine	IsoLine	IsoLine	IsoLine
Data Range	AG82:AG91,AI82:AI91
Filled Symbols	FALSE
ConcAge	FALSE
ConcSwap	FALSE
1st Symbol-row	1

## Sheet: PlotDat11
Source sheet	190410focus_All_Integrations	0.3	1.40195	1	1.41	0.12
Plot name	Average10	10.7	1.40195	2	1.34	0.12
Plot Type	15			3	1.33	0.11
1st free col	8			4	1.43	0.11
Sigma Level	2			5	1.48	0.11
Absolute Errs	TRUE			6	1.372	0.094
Symbol Type	1			7	1.52	0.12
Inverse Plot	FALSE			8	1.357	0.094
Color Plot	TRUE			9	1.46	0.11
3D plot	FALSE			10	1.366	0.1
Linear	FALSE			IsoLine	IsoLine	IsoLine	IsoLine
Data Range	AG93:AG102,AI93:AI102
Filled Symbols	FALSE
ConcAge	FALSE
ConcSwap	FALSE
1st Symbol-row	1

[truncated: 28 more sheets: PlotDat12, PlotDat13, PlotDat14, Table A1, Table A2, Table A3, Table A4, Table A5, PlotDat15, PlotDat16, PlotDat17, PlotDat18, PlotDat19, PlotDat20, PlotDat21, PlotDat23, PlotDat25, PlotDat26, PlotDat27, PlotDat28 …]
